# Supplementary material for: Status and Trends in the Rate of Introduction of Marine Non-Indigenous Species in European Seas
Source: MDPI journal article supplement (doi:10.3390/d14121077), 2022-12-06
Supplement: s1 [file s1]

## Supplementary materials

**Table S1:** Partly native or cryptogenic (CRY) species in European seas.

Regional Sea: ANS=Greater North Sea, ACS=Celtic Seas, ABI=Bay of Biscay-Iberian Shelf, MWE=western Mediterranean, MIC= central Mediterranean, MAD=Adriatic Sea, MAL= eastern Mediterranean. Abbreviation of taxonomic groups: BAC=Bacillariophyceae, BRY=Bryozoa, CIR=Cirripedia, CNI=Cnidaria CRU=Crustacea, DIN= Dinophyceae, MOL=Mollusca, MAL=Macroalgae, POL=Polychaeta, TUN=Tunicata, FISH=Fishes

| Group | Species                                                                               | Regional Sea |              |           |        |
|-------|---------------------------------------------------------------------------------------|--------------|--------------|-----------|--------|
|       |                                                                                       | BAL          | NEA          | MED       | BLK    |
| MAL   | <i>Acrothrix gracilis</i> Kylin                                                       |              | native       | NIS (MWE) |        |
| MAL   | <i>Aglaothamnion feldmanniae</i> Halos                                                |              | native       | NIS       |        |
| MAL   | <i>Antithamnionella spirographidis</i> (Schiffner) E.M. Wollaston                     |              | NIS          | CRY       |        |
| MAL   | <i>Ceramium circinatum</i> (Kützing) J.Agardh                                         |              | NIS (ANS)    | native    |        |
| MAL   | <i>Chorda filum</i> (Linnaeus) Stackhouse                                             |              | Native       | NIS       |        |
| MAL   | <i>Cladosiphon zosterae</i> (J.Agardh) Kylin                                          |              | Native       | NIS       |        |
| MAL   | <i>Cutleria multifida</i> (Turner) Greville                                           |              | native       | NIS       |        |
| MAL   | <i>Dasya baillouviana</i> (S.G.Gmelin) Montagne                                       |              | NIS          | native    |        |
| MAL   | <i>Desmarestia viridis</i> (O.F.Müller) J.V.Lamouroux                                 |              | Native       | NIS       |        |
| MAL   | <i>Ectocarpus siliculosus</i> var. <i>hiemalis</i> (P.L.Crouan & H.M.Crouan) Gallardo |              | Native       | NIS (MAD) |        |
| MAL   | <i>Fucus spiralis</i> Linnaeus, 1753                                                  |              | Native       | NIS       |        |
| MAL   | <i>Grateloupia minima</i> P.L.Crouan & H.M.Crouan                                     |              | Native (ACS) | NIS (MWE) |        |
| MAL   | <i>Griffithsia corallinoides</i> (Linnaeus) Trevisan                                  |              | Native       | NIS       |        |
| MAL   | <i>Halothrix lumbricalis</i> (Kützing) Reinke, 1888                                   | native       | Native       | NIS       |        |
| MAL   | <i>Punctaria tenuissima</i> (C.Agardh) Greville                                       |              | native       | NIS       |        |
| MAL   | <i>Pylaiella littoralis</i> (Linnaeus) Kjellman, 1872                                 |              | native       | NIS       |        |
| MAL   | <i>Rhodophysema georgei</i> Batters, 1900                                             |              | native       | NIS       |        |
| MAL   | <i>Solieria chordalis</i> (C.Agardh) J.Agardh                                         |              | NIS          | native    |        |
| POL   | <i>Alitta succinea</i> (Leuckart, 1847)                                               |              | CRY          |           | NIS    |
| POL   | <i>Amphiglena mediterranea</i> (Leydig, 1851)                                         |              | native       | native    | NIS    |
| POL   | <i>Boccardiella ligerica</i> (Ferroinère, 1898)                                       | NIS          | native       |           |        |
| POL   | <i>Polydora cornuta</i> Bosc, 1802                                                    |              | CRY          | NIS       | NIS    |
| POL   | <i>Polydora hoplura</i> Claparède, 1868                                               |              | NIS          | native    |        |
| CRU   | <i>Alpheus dentipes</i> Guérin, 1832                                                  |              | native       | native    | NIS    |
| CRU   | <i>Brachyotus sexdentatus</i> (Risso, 1827 in [Risso])                                |              | NIS          | native    |        |
| CRU   | <i>Cercopagis (Cercopagis) pengoi</i> (Ostroumov, 1891)                               | NIS          | -            | -         | native |
| CRU   | <i>Diamysis lagunaris</i> Ariani & Wittmann, 2000                                     |              | NIS (ABI)    | native    |        |
| CRU   | <i>Evadne anonyx</i> G.O. Sars, 1897                                                  | NIS          |              |           | native |
| CRU   | <i>Hexapleomera robusta</i> (Moore, 1894)                                             |              | NIS (ABI)    | native    |        |
| CRU   | <i>Neomysis integer</i> (Leach, 1814)                                                 | native       | Native       | NIS (MWE) |        |
| CRU   | <i>Paracartia grani</i> Sars G.O., 1904                                               |              | Native       | NIS       |        |
| CRU   | <i>Amphibalanus amphitrite</i> (Darwin, 1854)                                         | -            | NIS          | CRY       | NIS    |

|      |                                                                |     |                |                |        |
|------|----------------------------------------------------------------|-----|----------------|----------------|--------|
| CRU  | <i>Chthamalus stellatus</i> (Poli, 1791)                       |     | Native         | native         | NIS    |
| CRU  | <i>Erichthonius didymus</i> (Krapp-Schickel, 2013)             |     | NIS (ANS)      | native         |        |
| BAC  | <i>Chaetoceros circinalis</i> (Meunier) K.G. Jensen & Moestrup | NIS | CRY (ANS)      |                |        |
| MOL  | <i>Dreissena polymorpha</i> (Pallas, 1771)                     | NIS | NIS            |                | native |
| MOL  | <i>Gibbula ardens</i> (Salis Marschlins, 1793)                 |     | NIS (ANS)      | Native         |        |
| MOL  | <i>Aplus dorbignyi</i> (Payraudeau, 1826)                      |     | NIS (AMA)      | Native         |        |
| MOL  | <i>Littorina littorea</i> (Linnaeus, 1758)                     | -   | Native         | NIS (MWE)      | -      |
| MOL  | <i>Littorina saxatilis</i> (Olivi, 1792)                       |     | Native         | NIS (MAD)      |        |
| MOL  | <i>Mya arenaria</i> Linnaeus, 1758                             | CRY | CRY            | NIS            | NIS    |
| MOL  | <i>Ostrea stentina</i> Payraudeau, 1826                        |     | NIS (ABI)      | Native         |        |
| MOL  | <i>Phorcus lineatus</i> (da Costa, 1778)                       |     | Native         | NIS (MWE)      |        |
| MOL  | <i>Pseudofusus rostratus</i> (Olivi, 1792)                     |     | NIS            | Native         |        |
| MOL  | <i>Steromphala adansonii</i> (Payraudeau, 1826)                |     | NIS (ABI)      | Native         |        |
| MOL  | <i>Steromphala adriatica</i> Philippi, 1844                    |     | NIS (ABI)      | Native         |        |
| MOL  | <i>Steromphala albida</i> (Gmelin, 1791)                       |     | NIS (ABI, ANS) | Native         |        |
| MOL  | <i>Steromphala cineraria</i> (Linnaeus, 1758)                  |     | Native         | NIS (MAL, MIC) |        |
| TUN  | <i>Ascidella aspersa</i> (Müller, 1776)                        |     | Native         | NIS            |        |
| TUN  | <i>Molgula manhattensis</i> (De Kay, 1843)                     | NIS | CRY            | CRY            | NIS    |
| CNI  | <i>Blackfordia virginica</i> Mayer, 1910                       | NIS | NIS            | native         | native |
| CNI  | <i>Cordylophora caspia</i> (Pallas, 1771)                      | NIS | NIS            | NIS            | native |
| CNI  | <i>Diadumene cincta</i> Stephenson, 1925                       |     | Native         | NIS (MAD)      |        |
| CNI  | <i>Maeotias marginata</i> (Modeer, 1791)                       | NIS | NIS            |                | native |
| CNI  | <i>Pachycordyle michaeli</i> (Berrill, 1948)                   |     | NIS            | CRY            |        |
| BRY  | <i>Escharina vulgaris</i> (Moll, 1803)                         |     | NIS (ANS)      | native         |        |
| FISH | <i>Cyclopterus lumpus</i> Linnaeus, 1758                       |     | Native         | NIS            |        |

**Table S2.** Species native/cryptogenic in one subregion, but NIS in another subregion. For subregional abbreviations see Table 1

| Group      | Species                                                          | Native/Cryptogenic | NIS      |
|------------|------------------------------------------------------------------|--------------------|----------|
| macroalgae | <i>Cutleria multifida</i> (Turner) Greville                      | native: MED, NEA   | AMA      |
| macroalgae | <i>Grallatoria reptans</i> M.Howe                                | native: MED, NEA   | AMA      |
| macroalgae | <i>Hypnea flagelliformis</i> Greville ex J.Agardh                | native: MED, NEA   | AMA      |
| macroalgae | <i>Melanothamnus sphaerocarpus</i> (Børgesen) Díaz-Tapia & Maggs | native: MED, NEA   | AMA      |
| Polychaeta | <i>Terebella lapidaria</i> Linnaeus, 1767                        | native: MED, NEA   | ACS      |
| Crustacea  | <i>Neomysis integer</i> (Leach, 1814)                            | Native: NEA (ANS)  | ABI      |
| Crustacea  | <i>Erichthonius didymus</i> Krapp-Schickel, 2013                 | native: MED        | AMA, ANS |

|           |                                                  |                            |          |
|-----------|--------------------------------------------------|----------------------------|----------|
| Crustacea | <i>Perforatus perforatus</i> (Bruguère, 1789)    | native: MED, NEA           | AMA, ACS |
| Crustacea | <i>Zeuxo holdichi</i> Bamber, 1990               | native: NEA (ABI)          | ANS      |
| Mollusca  | <i>Hexaplex trunculus</i> (Linnaeus, 1758)       | native: MED, NEA           | AMA      |
| Mollusca  | <i>Ostrea edulis</i> Linnaeus, 1758              | native: MED, NEA           | AMA      |
| Mollusca  | <i>Ruditapes decussatus</i> (Linnaeus, 1758)     | native: MED, NEA           | AMA      |
| Mollusca  | <i>Bedevea paivae</i> (Crosse, 1864)             | native: NEA                | AMA      |
| Mollusca  | <i>Mytilus galloprovincialis</i> Lamarck, 1819   | native: MED<br>native: NEA | AMA      |
| Mollusca  | <i>Mytilus edulis</i> Linnaeus, 1758             | native: NEA                | AMA      |
| Mollusca  | <i>Ostrea edulis</i> Linnaeus, 1758              | native: MED, NW Europe     | AMA      |
| Mollusca  | <i>Phorcus sauciatus</i> (F. C. L. Koch, 1845)   | native: NEA                | AMA      |
| Tunicata  | <i>Alloeocarpa loculosa</i> Monniot C., 1974     | native: NEA                | AMA      |
| Tunicata  | <i>Aplidium glabrum</i> (Verrill, 1871)          | native: NEA                | AMA      |
| Tunicata  | <i>Clavelina lepadiformis</i> (Müller, 1776)     | native: MED, NEA           | AMA      |
| Tunicata  | <i>Clavelina dellavallei</i> (Zirpolo, 1925)     | native: MED, NEA           | AMA      |
| Tunicata  | <i>Didemnum candidum</i> Savigny, 1816           | native: MED, NEA           | AMA      |
| Porifera  | <i>Crambe crambe</i> (Schmidt, 1862)             | native: MED, NEA           | AMA      |
| Bryozoa   | <i>Amathia verticillata</i> (delle Chiaje, 1822) | cryptogenic: MED, NEA      | AMA      |
| Bryozoa   | <i>Amathia gracilis</i> (Leidy, 1855)            | cryptogenic: MED, NEA      | AMA      |
| Bryozoa   | <i>Bugula neritina</i> (Linnaeus, 1758)          | cryptogenic: MED, NEA      | AMA      |
| Bryozoa   | <i>Schizoporella errata</i> (Waters, 1878)       | cryptogenic: MED, NEA      | AMA      |
| Bryozoa   | <i>Watersipora subtorquata</i> (d'Orbigny, 1852) | cryptogenic: MED, NEA      | AMA      |
| Cnidaria  | <i>Kirchenpaueria halecioides</i> (Alder, 1859)  | native: MED, NEA           | AMA      |
| Cnidaria  | <i>Oculina patagonica</i> de Angelis, 1908       | cryptogenic: MED, NEA      | AMA      |
| Fishes    | <i>Sparus aurata</i> Linnaeus, 1758              | native: MED, NEA           | AMA      |
